# Supplementary material
Source: PubMed Central journal article supplement (PMC2745341)

## Supplementary Figure and Table Legends

**Supplementary Table S1.** Top 20 data sets by weight  $w_d$  with GEO accession numbers.

**Supplementary Table S2.** Zebrafish morpholino sequences.

**Supplementary Table S2.** RT-PCR Primer sequences.

**Supplementary Figure S1.** Mammalian SLC22A4 lacks a unique zebrafish ortholog.

Dendrogram generated by multiple alignment of protein sequences using ClustalW.

Branch lengths reflect alignment dissimilarity.

**Supplementary Figure S2.** Quantitative enumeration of anemia in WT and morphant zebrafish embryos. The percentage of embryos showing normal hemoglobinization (WT), reduced levels of hemoglobinized cells (reduced), or absence of hemoglobinized cells (null) was determined for different rounds of injections using the same optimal morpholino concentration for each gene. Embryo numbers are indicated above each bar.

**Supplementary Figure S3.** Morpholino knockdown of the candidate genes does not affect erythroid or myeloid lineage specification. Control wildtype (WT) and morpholino injected embryos were stained for  $\alpha$ E3-globin (*hbae3*) at 24- and 48hpf, and for myeloperoxidase (*mpo*) at 48hpf.

## Supplementary Table S1

| GEO Acc | Species | Chip  | Description                                          | Weight $w_d$ |
|---------|---------|-------|------------------------------------------------------|--------------|
| GSE4655 | Human   | U133+ | In vitro erythroid differentiation                   | 0.99         |
| GSE5657 | Mouse   | M430  | Hypophosphatemia in mid-shaft of femur               | 0.98         |
| GSE5671 | Mouse   | M430  | Cardiac differentiation of embryonic stem cells      | 0.98         |
| GSE9954 | Mouse   | M430  | Tissue atlas                                         | 0.96         |
| GSE1133 | Human   | U133A | Tissue atlas                                         | 0.95         |
| GSE4310 | Mouse   | U74A  | Lung Development Timecourse                          | 0.94         |
| GSE3241 | Mouse   | M430A | Sca1-CD45 sorted bone marrow                         | 0.93         |
| GSE3912 | Human   | U133A | Relapse in childhood acute lymphoblastic leukemia    | 0.92         |
| GSE4698 | Human   | U133A | Relapse in childhood acute lymphoblastic leukemia    | 0.90         |
| GSE5891 | Mouse   | M430  | Fetal liver                                          | 0.87         |
| GSE6787 | Mouse   | U74A  | Fetal liver, Rb-/-                                   | 0.87         |
| GSE8836 | Mouse   | M430  | B-cell chronic lymphocytic leukemia                  | 0.85         |
| GSE7020 | Mouse   | M430  | Nix ablation in apoptosis and erythropoiesis         | 0.83         |
| GSE5811 | Mouse   | M430A | Splenocyte response to Bcl-2 overexpression          | 0.81         |
| GSE4324 | Mouse   | M430A | WBCs from spleen after Plasmodium chabaudi infection | 0.80         |
| GSE1922 | Human   | U133A | Leukemia, K562 cell line                             | 0.78         |
| GSE135  | Mouse   | U74A  | Erythroid Progenitor Cell Gene Expression Profiles   | 0.78         |
| GSE4619 | Human   | U133+ | CD34+ cells from MDS patients and normal controls    | 0.78         |
| GSE9894 | Human   | U133+ | Human bone marrow mesenchymal stem cells             | 0.78         |
| GSE6506 | Mouse   | M430  | Hematopoietic stem cells and their progeny           | 0.73         |

**Supplementary Table S2: Zebrafish morpholino sequences**

|                        | <b>Morpholino</b>          |
|------------------------|----------------------------|
| <b><i>slc25a39</i></b> | CTGCTTGTGATCTGTACCTTGAAAG  |
| <b><i>slc22a5</i></b>  | ACATCACAGCAGGCTCACCGAGAAC  |
| <b><i>slc22a4</i></b>  | ATCTCACTGCCTGCAGATCAAGATG  |
| <b><i>tmem14c</i></b>  | ATCGAGCATTCTCATTACCTGCTTT  |
| <b><i>c1orf69</i></b>  | GTGTGTTAATTTTACCTGTAAAGGA  |
| <b><i>isca1</i></b>    | ATGGAGTCAGAACTCACCGAGTGTTA |

**Supplementary Table S3: RT-PCR Primer sequences**

|                                        |                                                                |
|----------------------------------------|----------------------------------------------------------------|
| <b><i>slc25a39</i></b>                 | Fwd: CCGGCAGGATGGGAGAT<br>Rev: CAGCTATGAGAGGTATGTGGTC          |
| <b><i>slc22a5</i></b>                  | Fwd: GGTCCCGTTGGCCAGCTCTACTCT<br>Rev: TAATGCAGAAACGCCCCCAGTGTG |
| <b><i>slc22a4</i></b>                  | Fwd: CTTCTGTGGTGTGTTTAGTGG<br>Rev: CAGGATGAGAGCGTAGTATG        |
| <b><i>tmem14c</i></b>                  | Fwd: ATTACGAGTTGACTACACGAA<br>Rev: AAGTTTTGCCAGCATCAGGAC       |
| <b><i>c1orf69</i></b>                  | Fwd: CGGACTTCAGGCGCACTATTT<br>Rev: AGATCTCCGACTCCTTCAG         |
| <b><i><math>\beta</math>-actin</i></b> | Fwd: GTTGGTATGGGACAGAAAGACAG<br>Rev: ACCAGAGGCATACAGGGACAG     |

## Supplementary Figure S1

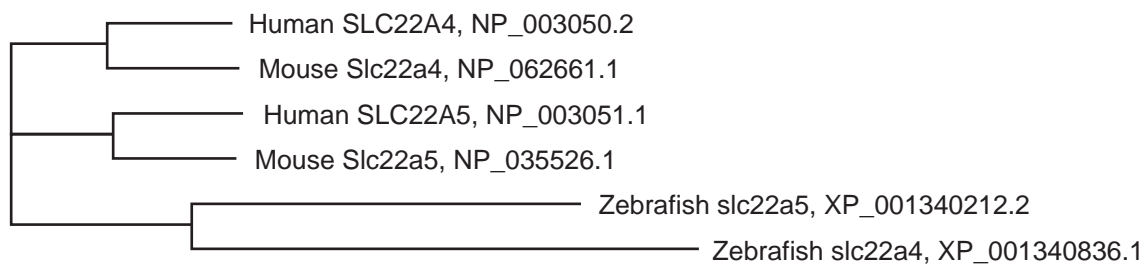

## Supplementary Figure S2

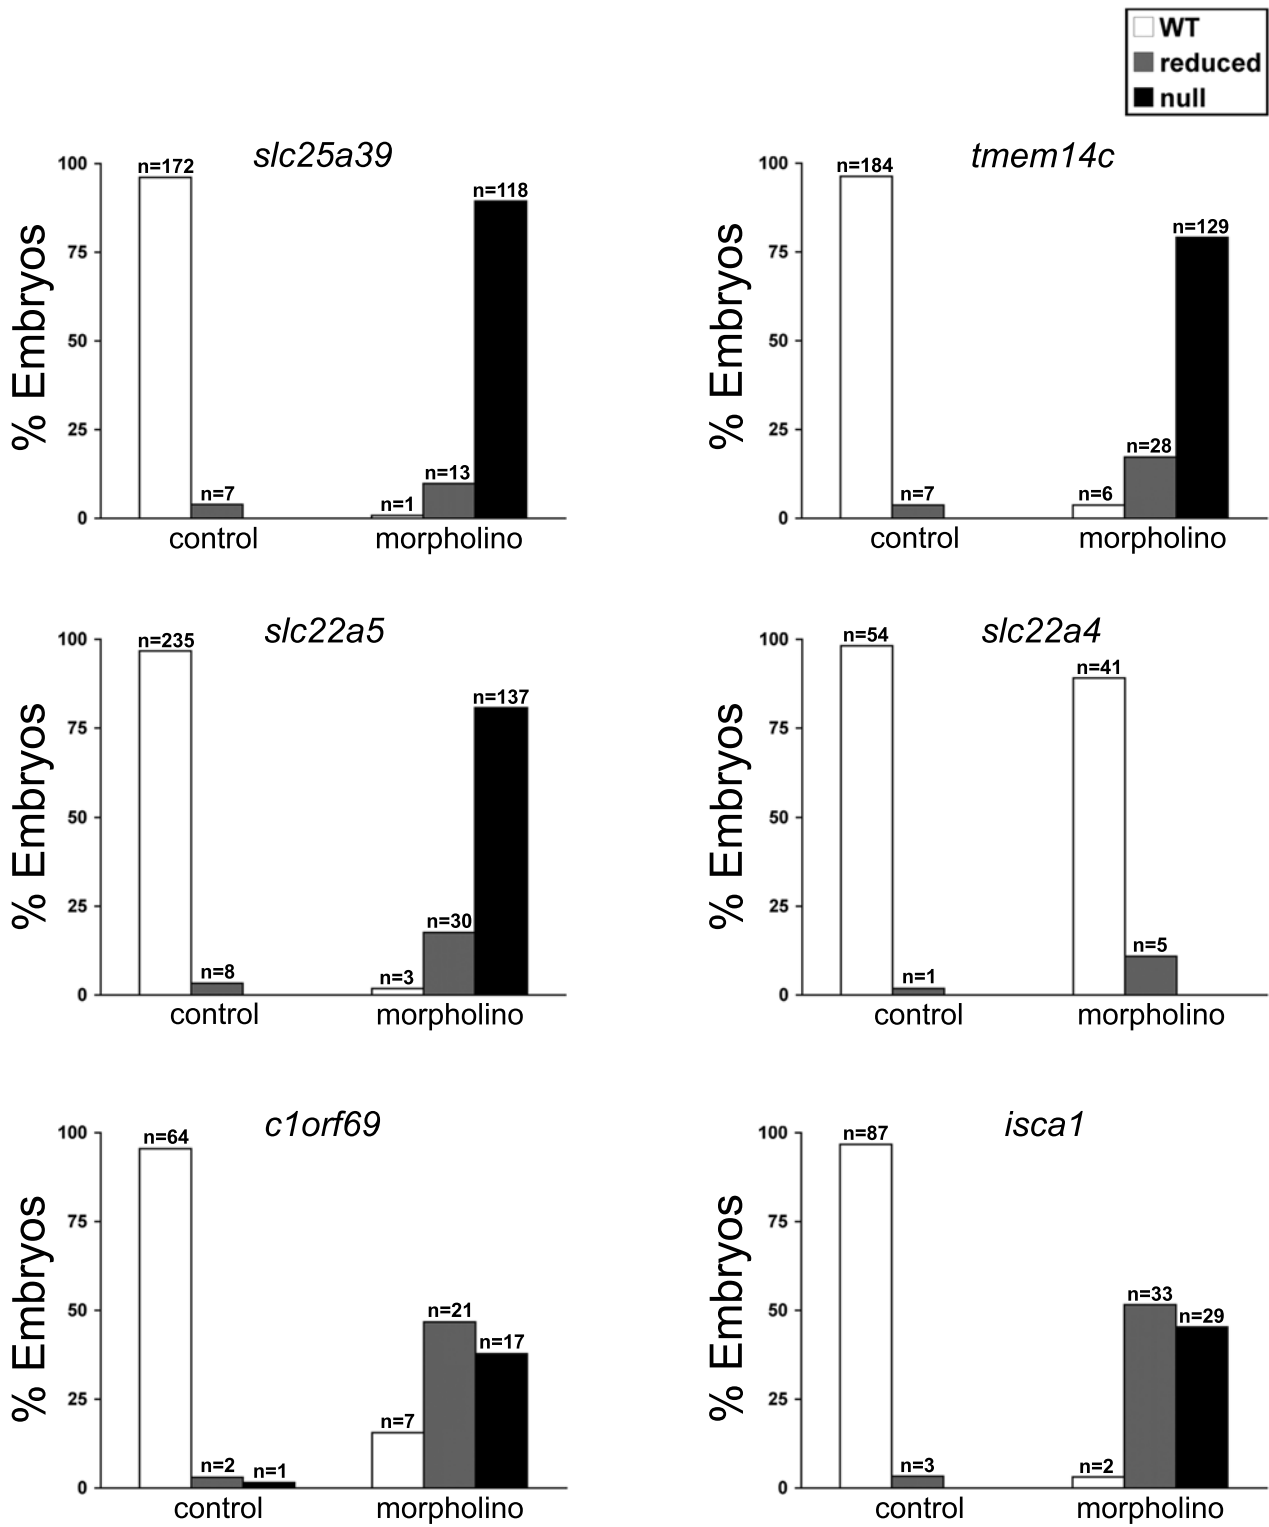

# Supplementary Figure S3

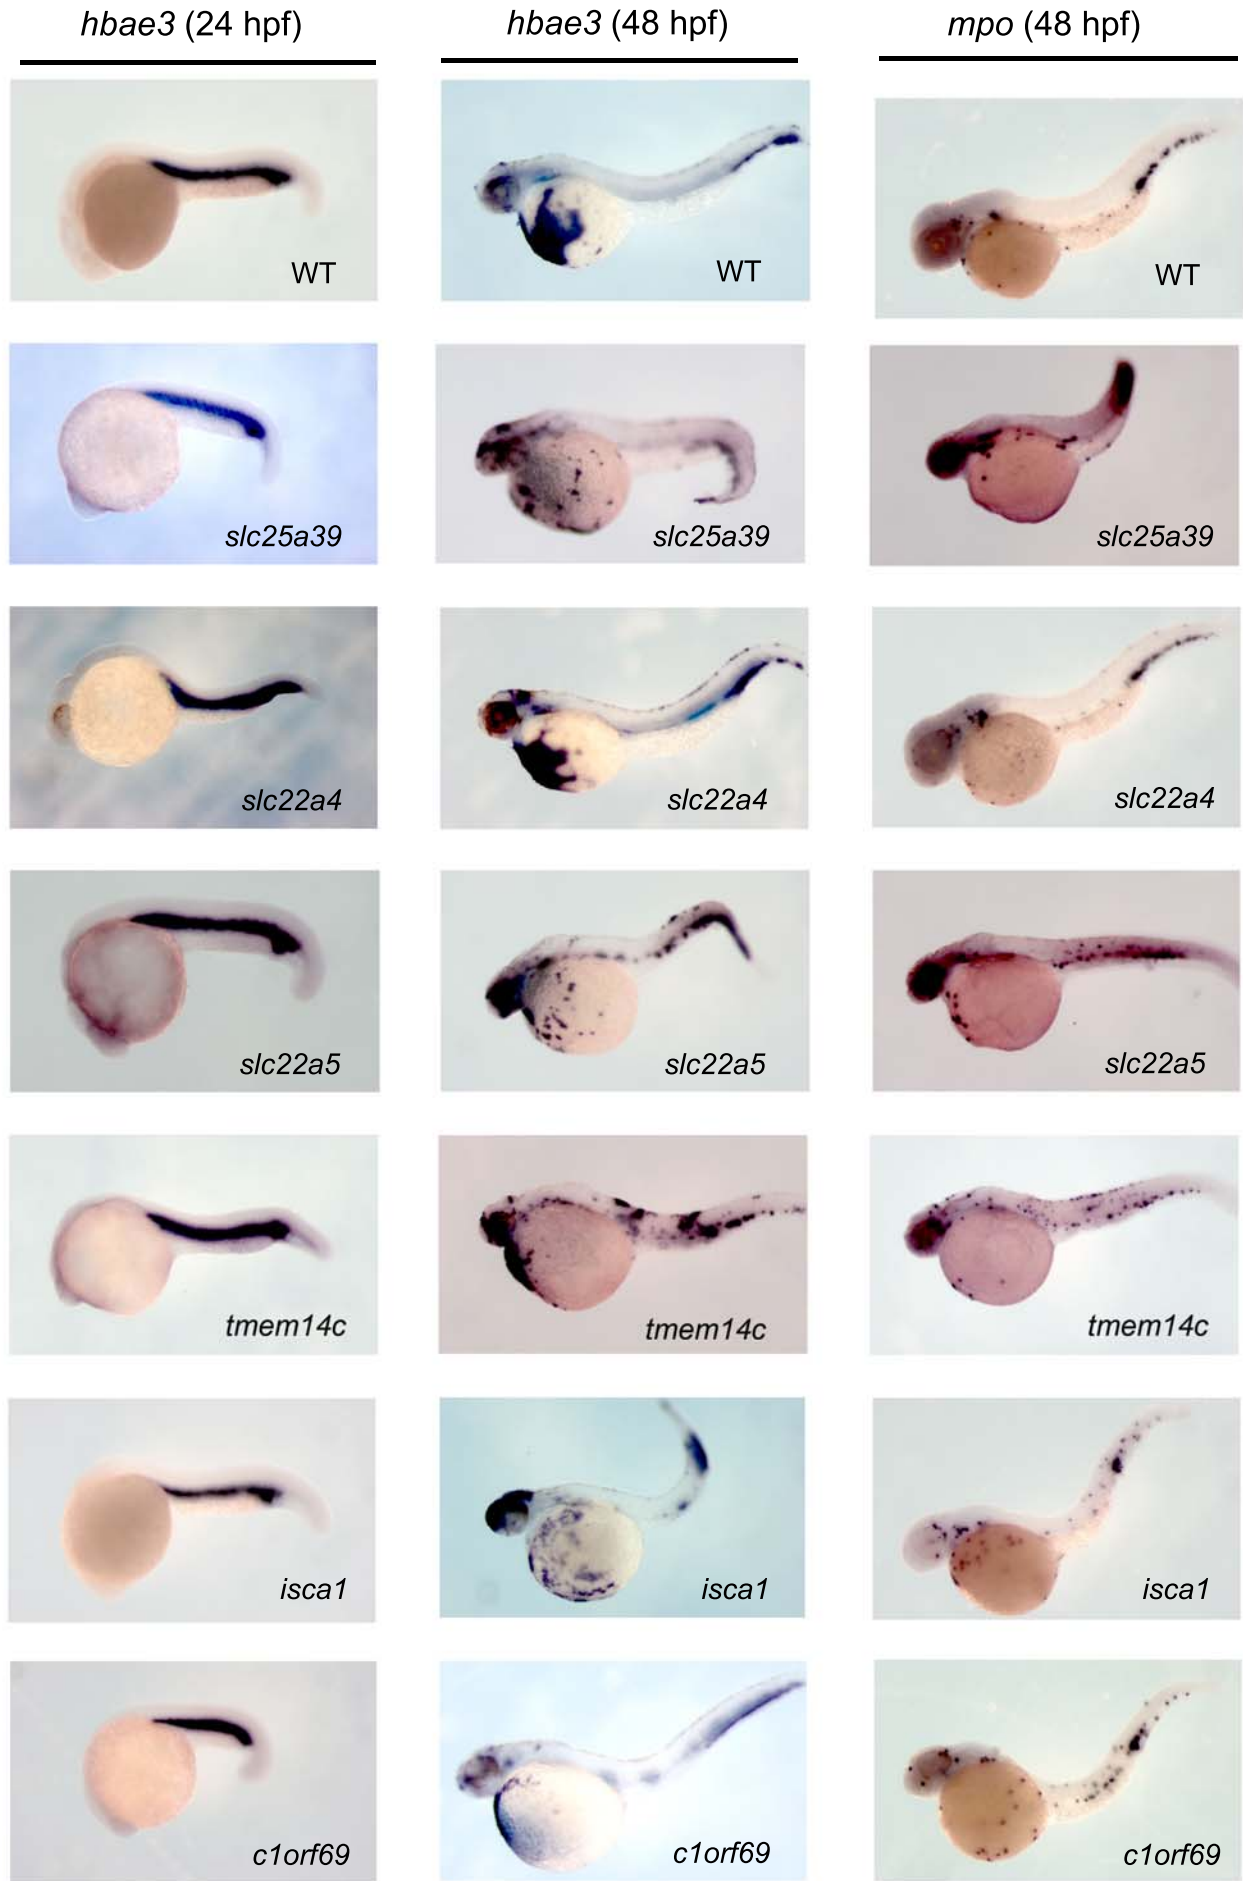

Supplement: NIHMS130414-supplement-01.pdf [file NIHMS130414-supplement-01.pdf]
